# Supplementary material
Source: PubMed Central journal article supplement (PMC7335456)

Supplimentary Figure 1.pdf

Suppl fig 2.pdf

[gDTcells 1a.pdf](#)

[DNT cells 1b.pdf](#)

[CD4 CD8 1c.pdf](#)

[HLA-DR 1d.pdf](#)

S Fig 1 Gating Strategy for gamma delta T cells and subsets.

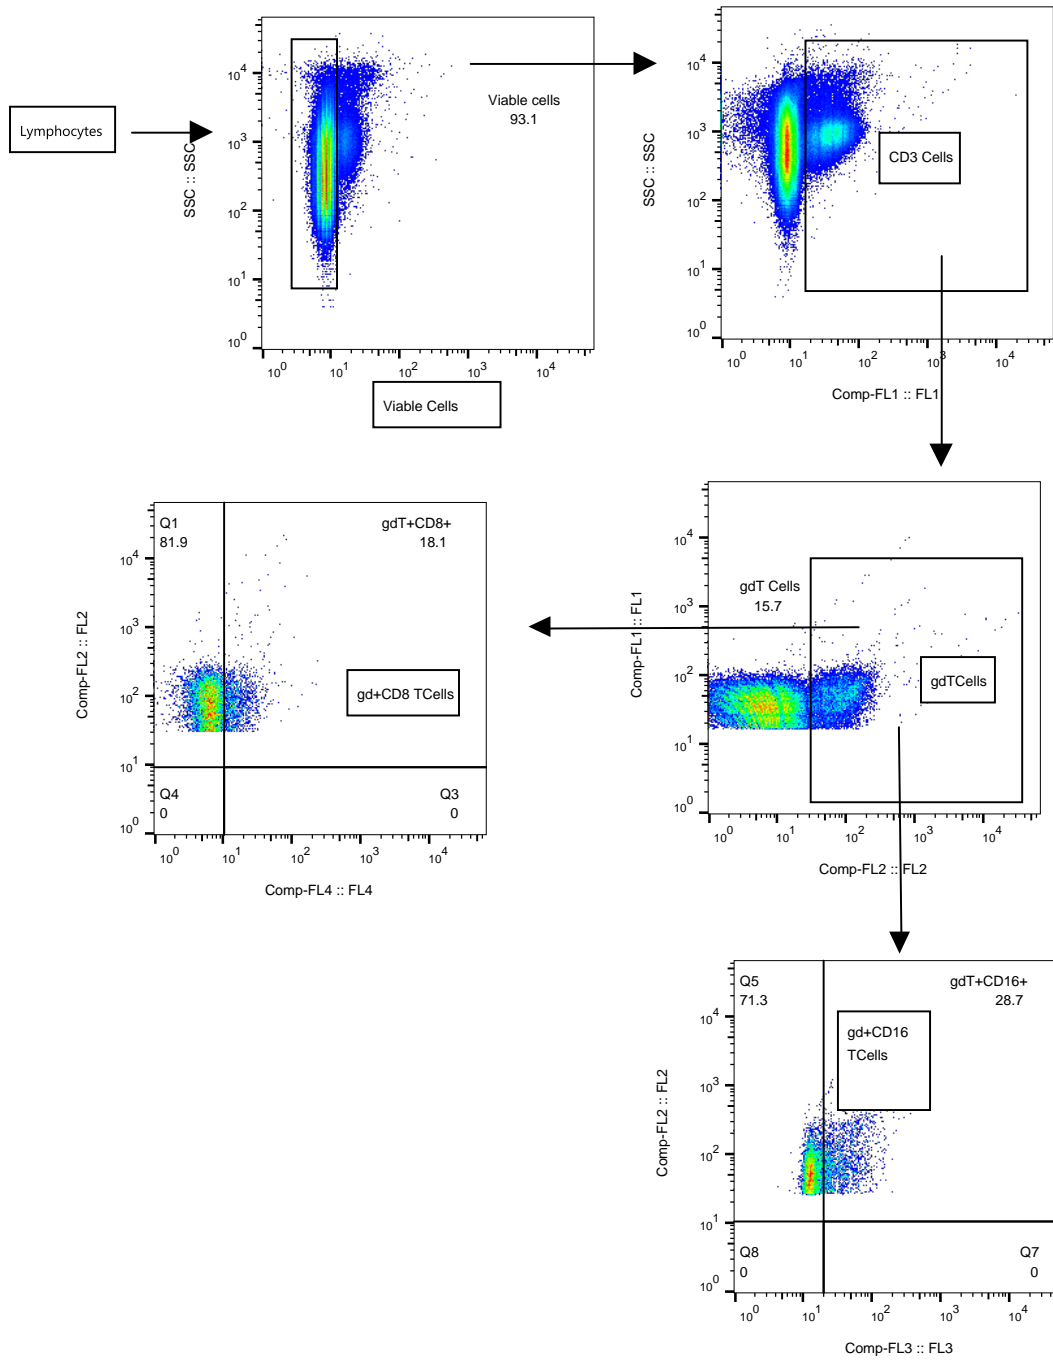

S Fig 2 Gating strategy for DNT cells

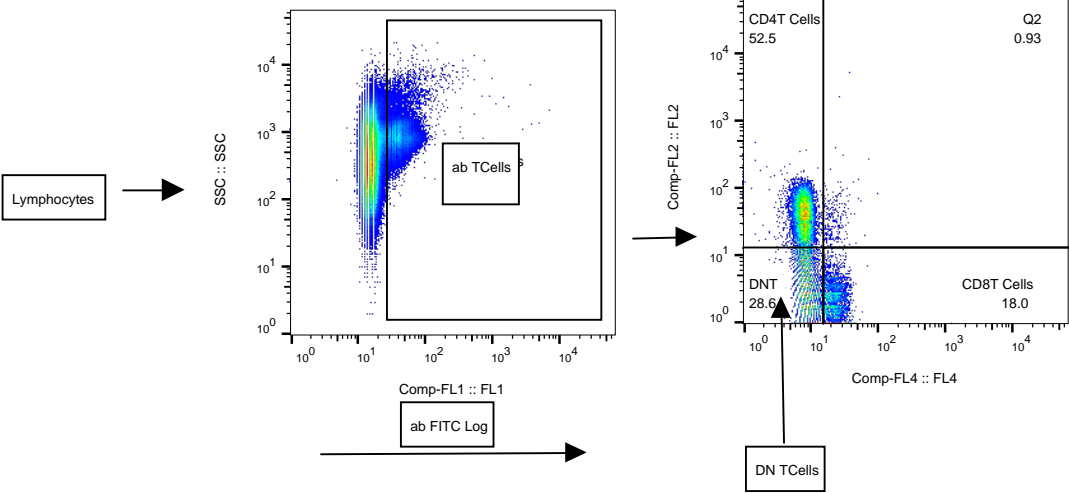

S Fig.3 Gating Strategy for CD4 and CD8 T cells

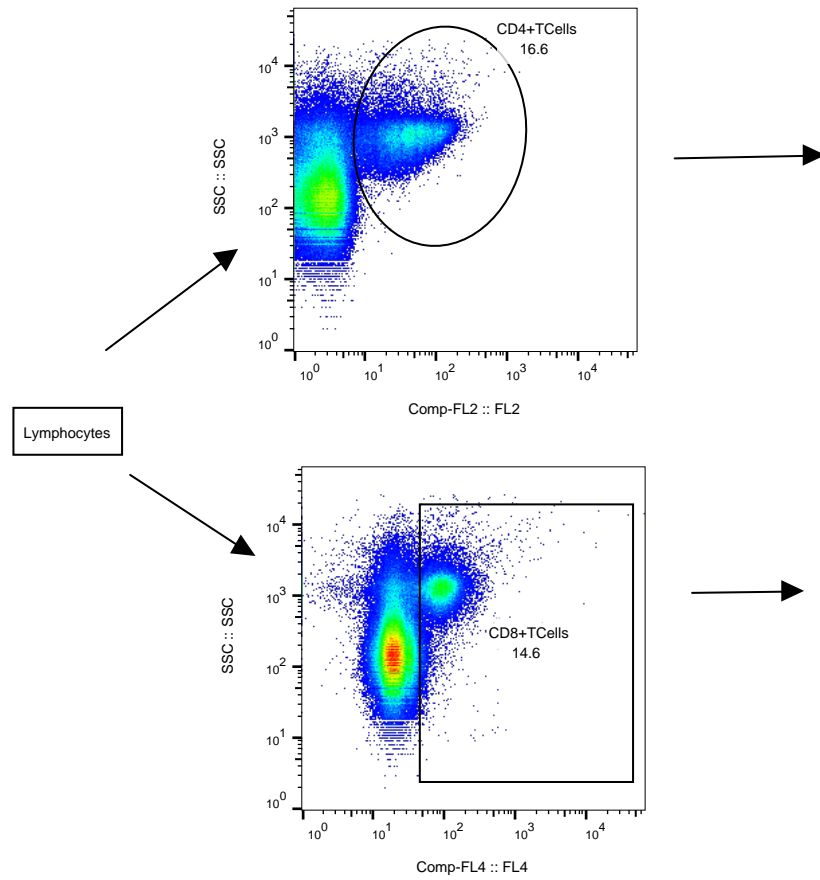

1895H.fcs  
Lymphocytes  
180567

S Fig 4 Gating strategy for CD4+HLA-DR and CD8+HLA-DR

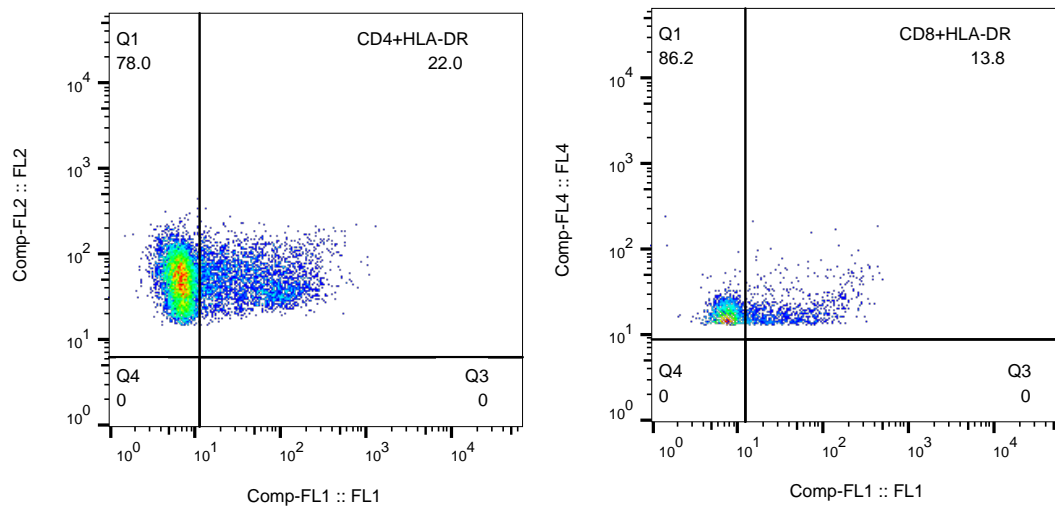

Supplement: NIHMS1570294-supplement-Supp_Fig1-4.pdf [file NIHMS1570294-supplement-Supp_Fig1-4.pdf]
