# Supplementary material
Source: PubMed Central journal article supplement (PMC7335456)

S Fig 5

**(A)**  
Correlation between DNTcells; CD4+HLA-DR and CD8+HLA-DR (ARTunexposed)  
DNT and CD4+HLA-DR: Pearson  $r=0.3089$ ; **P=0.0465**,  $r^2=0.09541$   
DNT and CD8+HLA-DR: Pearson  $r=-0.03169$ ;  $P=0.8421$ ,  $r^2=0.001005$

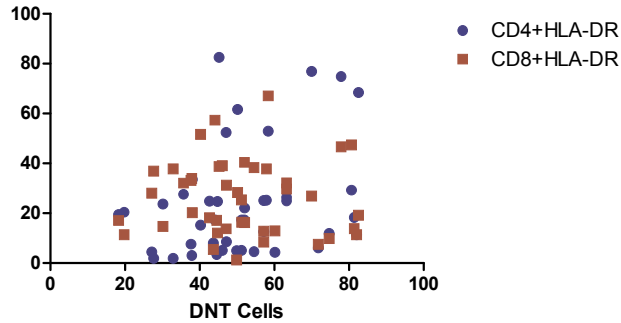

**(B)**  
Correlation between DNTcells; CD4+HLA-DR and CD8+HLA-DR (ARTexposed)  
DNT and CD4+HLA-DR: Pearson  $r=-0.1362$ ;  $P=0.3958$ ,  $r^2=0.01855$   
DNT and CD8+HLA-DR: Pearson  $r=-0.2979$ ; **P=0.0585**,  $r^2=0.08875$

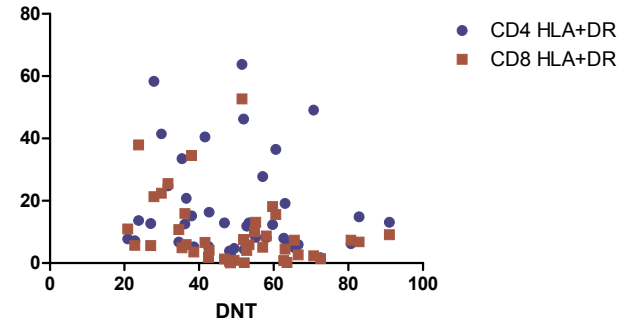

**(C)**  
Correlation between  $\gamma\delta$ Tcells; CD4+HLA-DR and CD8+HLA-DR (ARTunexposed)  
 $\gamma\delta$ T and CD4+HLA-DR: Pearson  $r=0.6808$ ; **P<0.0001**,  $r^2=0.4636$   
 $\gamma\delta$ T and CD8+HLA-DR: Pearson  $r=0.1254$ ;  $P=0.4530$ ,  $r^2=0.01573$

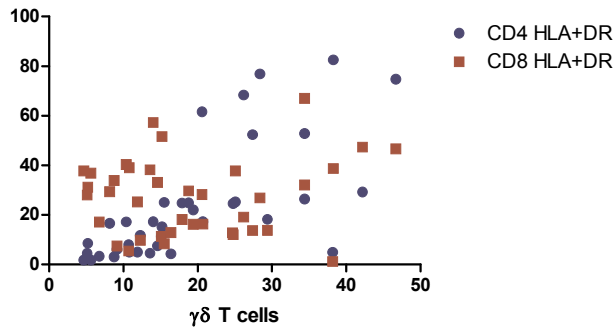

**(D)**  
Correlation between  $\gamma\delta$ Tcells; CD4+HLA-DR and CD8+HLA-DR (ARTexposed)  
 $\gamma\delta$ T and CD4+HLA-DR: Pearson  $r=-0.01841$ ;  $P=0.9164$ ,  $r^2=0.0003389$   
 $\gamma\delta$ T and CD8+HLA-DR: Pearson  $r=-0.05342$ ;  $P=0.7605$ ,  $r^2=0.002853$

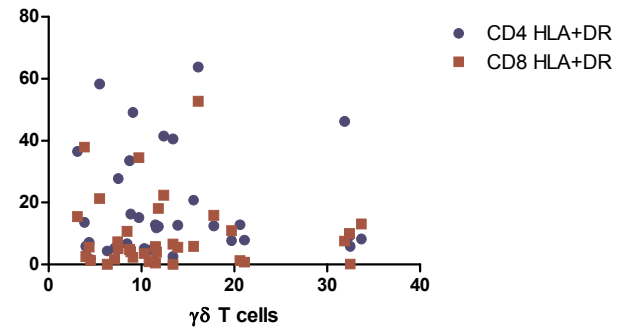

Supplement: NIHMS1570294-supplement-Supp_figS5.pdf [file NIHMS1570294-supplement-Supp_figS5.pdf]
